# Supplementary material for: Comparison of gravity wave propagation direction observed by mesospheric airglow imaging at three different latitudes by using M-transform
Source: Copernicus journal article supplement (doi:10.5194/angeo-2018-107), 2018-09-20
Supplement: Supplementary file [file angeo-2018-107-AC3-supplement.pdf]

# Comparison of gravity wave propagation directions observed by mesospheric airglow imaging at three different latitudes using the M-transform

Septi Perwitasari<sup>1,3</sup>, Takuji Nakamura<sup>1,2</sup>, Masaru Kogure<sup>2,1</sup>, Yoshihiro Tomikawa<sup>1,2</sup>, Mitsumu K. Ejiri<sup>1,2</sup>, Kazuo Shiokawa<sup>4</sup>

5 <sup>1</sup>National Institute of Polar Research, Tokyo, 190-8518, Japan

<sup>2</sup>Department of Polar Science, SOKENDAI (The Graduate University for Advanced Studies), Tokyo, 190-8518, Japan

<sup>3</sup>National Institute of Aeronautics and Space (LAPAN) of Indonesia, Bandung, 40173, Indonesia

<sup>4</sup>Institute for Space-Earth Environmental Research, Nagoya University, Nagoya, 464-8601, Japan

*Correspondence to:* Septi Perwitasari (septi.perwitasari@gmail.com)

10 **Abstract.** We developed user-friendly software based on *Matsuda et al.'s* (2014) 3D-FFT method (Matsuda-transform, M-transform) for airglow imaging data analysis as a function of Interactive Data Language (IDL). Users can customize the range of wave parameters to process when executing the program. The input for this function is a 3D array of a time series of a 2D airglow image in geographical coordinates. We applied this new function to mesospheric airglow imaging data with slightly different observation parameters obtained for the period of April–May at three different latitudes: Syowa Station, 15 the Antarctic (69°S, 40°E); Shigaraki, Japan (35°N, 136°E); and Tomohon, Indonesia (1°N, 122°E). The day-to-day variation of the phase velocity spectrum at the Syowa Station is smaller and the propagation direction is mainly westward. In Shigaraki, the day-to-day variation of the horizontal propagation direction is larger than that at the Syowa Station; the variation in Tomohon is even larger. In Tomohon, the variation of the nightly power spectrum magnitude is remarkable, which indicates the intermittency of atmospheric gravity waves (AGWs). The average nightly spectrum obtained from April–20 May shows that the dominant propagation is westward with a phase speed <50 m/s at the Syowa Station and east/southeastward with a phase speed of up to ~80 m/s in Shigaraki. The day-to-day variation in Tomohon is too strong to discuss average characteristics; however, a phase speed of up to ~100 m/s and faster is observed. The corresponding background wind profiles derived from MERRA-2 indicate that wind filtering plays a significant role in filtering out waves that propagate eastward at the Syowa Station. On the other hand, the background wind is not strong enough to filter out relatively high-speed AGWs 25 in Shigaraki and Tomohon and the dominant propagation direction is likely related to the distribution/characteristics of the source region, at least in April and May.

## 1 Introduction

Atmospheric gravity waves (AGWs) or buoyancy waves are oscillations caused by the vertical displacement of an air parcel, which is restored to its initial position by buoyancy. These waves, which primarily originate in the lower atmosphere, propagate into the upper mesosphere and lower thermosphere (e.g., Lindzen, 1981; Matsuno, 1982; Fritts, 1984; Fritts and Alexander, 2003). The study of AGWs is important because these waves transport energy and momentum vertically and drive the general circulation up to ~100 km. The AGWs greatly affect the global temperature structure through general circulation. Therefore, the understanding of AGWs and their implementation in numerical models, such as climate models, are very important to improve such models and increase their precision. However, quantitative observational studies are progressing slowly, partly because of the difficulties related to investigating global AGW characteristics. One difficulty is that AGWs cover a very broad spectrum (the wave periods range from minutes to hours and spatial scales extend up to thousands of kilometers). Although satellite observations can provide a global view of AGW phenomena, they are limited to the portion of AGWs with a large scale because of the low horizontal and/or vertical resolutions of the instruments (Alexander, 1998; Wright et al., 2015). Therefore, studies using ground-based measurements with high horizontal and/or vertical resolutions are essential to reveal the global characteristics of AGWs.

Among various ground-based observations, airglow-imaging observations have been proven to be very effective in determining both the energy and propagation characteristics. In the last few decades, airglow imagers have been deployed at various latitudes to study AGWs in equatorial, mid-latitude, and polar regions (e.g., Shiokawa et al., 2009; Suzuki et al., 2007; Matsuda et al., 2014, 2017). Such long-term observations provide a huge amount of data. However, the lack of sophisticated analysis methods prevents quantitative studies based on complete worldwide datasets that have been collected with great efforts.

A new analysis algorithm has been developed by the National Institute of Polar Research (NIPR) group to obtain the power spectrum in the horizontal phase velocity domain from long series data of airglow, as shown in Matsuda et al. (2014; Matsuda-transform, M-transform). The M-transform method transforms airglow-intensity image data to a power spectrum in the horizontal phase velocity domain. This method can handle a huge amount of data. Therefore, the time consumption and manpower required for the analysis of such a huge amount of airglow data are reduced. This method has been successfully applied to Antarctic Gravity Wave Instrument Network (ANGWIN) imagers that are used to study the characteristics of mesospheric AGWs over Antarctica, as reported by Matsuda et al. (2017). Takeo et al. (2017) and Tsuchiya et al. (2018) applied this method to 16-year airglow imaging data from Shigaraki (35°N, 136°E) and Rikubetsu (44°N, 144°E), Japan, to study the horizontal phase speed and propagation direction at mid-latitudes.

Despite the high success of this method's application, several subroutines must be separately executed in the original program, which is not user-friendly. Therefore, we developed a simple user-friendly function based on Matsuda et al.'s (2014) method that can be handled by users with different backgrounds and programming skills. We encourage AGW research groups to use the program for the analysis of their data and produce results in a uniform format (power spectrum

in the phase velocity domain). This will make it easier to compare the AGW phase velocities and energy distributions of different locations, that is, of different latitudes and longitudes. This paper is organized as follows. Section 2 describes the M-transform function and its use. Section 3 shows the comparison of phase speed spectra obtained with the M-transform application for different airglow datasets with different observation parameters recorded at different latitudes: Syowa Station (69°S, 40°E), Shigaraki (35°N, 136°E), and Tomohon Observatory (1°N, 122°E). The conclusions of this paper are provided in Section 4.

## 2 M-Transform Function

The M-transform function is a 3D FFT function using Interactive Data Language (IDL; <http://www.exelisvis.com/ProductsServices/IDL.aspx>), which is used to analyze airglow imaging data based on the method developed by Matsuda *et al.* [2014]. This method requires time series of airglow images in 3D array format, which have been preprocessed to have fixed intervals of image pixels ( $dx$ ,  $dy$ ) and time ( $dt$ ). These preprocessed images should be obtained through common airglow image preprocessing, that is, (1) star removal, (2) correction of the Van Rijnin effect if necessary, and (3) projection onto a geographical coordinate system in equal distances in latitudinal and longitudinal direction (e.g., Kubota *et al.*, 2001; Suzuki *et al.*, 2007). It is also recommended to normalize the airglow intensity values to compare the power spectral values of different datasets. For this purpose,  $((I - \bar{I})/\bar{I})$ , where  $I$  is the image intensity of each pixel, should be used in the input array. Our M-transform code applies 2D prewhitening to the images to reduce the contamination of higher wavenumbers with lower-wavenumber peaks of the red AGW spectrum. It also applies the 2D Hanning window to reduce the harmonics of the window function in horizontal direction (Coble *et al.*, 1998). Matsuda *et al.*'s (2014) new method transforms the Power Spectrum Density (PSD) in the wave number domain ( $k$ ,  $l$ ,  $\omega$ ) to the phase velocity domain ( $v_x$ ,  $v_y$ ,  $\omega$ ) based on the following equations:

$$v_x = \omega k / (k^2 + l^2) \quad (1)$$

$$v_y = \omega l / (k^2 + l^2), \quad (2)$$

where  $v_x$  and  $v_y$  are the orthogonal projections of the phase velocity onto zonal and meridional axes, respectively [ $(v_x, v_y) = c(\sin \varphi, \cos \varphi)$ , where  $c$  and  $\varphi$  are the phase speed and azimuth (east from north) of the phase velocity]. Note that  $v_x$  and  $v_y$  are not the phase velocities in the zonal or meridional directions or cross sections;  $\omega$  is the frequency; and  $k$  and  $l$  are the zonal and meridional wavenumbers, respectively. Finally, the phase velocity spectrum is integrated over the frequency and results in a 2D phase velocity spectrum.

The original program developed by Matsuda *et al.* (2014) consisted of several subroutines, which were used to calculate the 3D FFT, create an interpolation table, perform the interpolation, and separately plot the results. The users had to set the wave parameters in each subroutine and had to run it one by one, making the process complicated and inefficient. Furthermore, once the users failed to compile one of the subroutines, the program failed to run and the users had to check the

subroutine one by one again. Therefore, a simple, hassle-free one-line-command software with adjustable input keywords is necessary to efficiently apply this method.

Table 1 shows the description of the M-transform function and Fig. 1 shows how to run the program. To run this function, the user can simply use the calling sequence “*Result = Matsuda\_transform(Img)*”, where “*Img*” is the 3D array of the preprocessed images in geographic coordinates ( $x, y, t$ ). The image resolutions ( $dx, dy, dt$ ), wave parameters (horizontal wavelength,  $LH$ ), wave period ( $\tau$ ), phase speed ( $Vp$ ), and size of zero padding ( $zpx, zpy, zpt$ ) can be adjusted by setting input parameter keywords. The default image resolution is 1 km in both zonal ( $dx$ ) and meridional ( $dy$ ) direction. The default image interval time ( $dt$ ) is 60 s. The default minimum and maximum values of the wave parameters are:  $5 \leq LH \leq 100$  km,  $8 \leq \tau \leq 60$  min, and  $0 \leq Vp \leq 150$  m/s. The default output of this program is a 2D phase velocity spectrum. The default interpolation method of this new function is the Delaunay triangulation method [e.g., Dwyer, 1987; Su et al., 1997]. One restriction of this program is that it requires an equal time interval ( $dt$ ). This may not be the case for practical observations, where filter rotations or background (or dark) images for the calibration are obtained from the observation sequence. In that case, users have to interpolate the image to obtain a constant  $dt$  interval before applying this function. More details on the function development are provided elsewhere.

Figure 2 shows an example of the use of the M-transform function. The input are airglow data over the Syowa Station obtained on September 20, 2011 (the same data set as used in Matsuda et al., 2014), which have the following dimensions:  $x = 400$  km,  $y = 400$  km,  $t = 21$  min ( $\times 3$  min). Because the image time resolution was 3 minutes, the  $dt$  input keyword was set to  $dt = 180$  s. The default values were used for the other wave parameters. The IDL console shows the input, calling sequence, total calculation time, and output. The output is a 2D phase velocity spectrum (right panel). The horizontal axis is  $v_x$ , the vertical axis is  $v_y$ , and the color bar shows the PSD on a logarithmic scale. The phase velocity spectrum shows dominant propagation in southwestward direction, which agrees with the wave propagation observed in the airglow preprocessed image movie in the Supplementary material (S1) as that reported by Matsuda et al. (2014). The total calculation time of the M-transform function for 21 images with  $400 \times 400$  pixels was  $\sim 1.4$  min using a personal computer. The calculation was performed on a MacBook Pro with a dual core 2.8 GHz Intel Core i7 processor with 4 MB cache size and 16 GB memory, while the program was single-threaded.

### 3 Comparison of the phase velocity spectra obtained with the M-transform function for different airglow datasets at three different latitudes

We applied this new M-transform function to various airglow datasets obtained at three different latitudes. Table 2 shows the summary of each airglow imager used in this analysis. Syowa Station ( $69^\circ\text{S}, 40^\circ\text{E}$ ) data represent airglow data in the polar region, while Shigaraki ( $35^\circ\text{N}, 136^\circ\text{E}$ ) and Tomohon ( $1^\circ\text{N}, 122^\circ\text{E}$ ) data represent the mid-latitude and equatorial regions, respectively. We used the Na (589.6 nm) airglow emission obtained at the Syowa Station and OI (557.7 nm) airglow emission recorded in Shigaraki and Tomohon.

We observed **nine** clear-sky nights at the Syowa Station **from** April–May 2013, ten clear-sky nights in Shigaraki from April–May 2011, and five clear-sky nights in Tomohon from April–May 2016. The Syowa data were the same dataset as that reported by *Matsuda et al.* (2017). **The image size** for each observation site was  $400 \times 400$  km and the sampling interval ( $dt$ ) was 1 min (Syowa), 5.5 min (Shigaraki), and 2.5 min (Tomohon). The different sampling intervals limit the maximum phase velocity to be **analyzed**; that at Shigaraki was the smallest. **To** avoid an aliasing effect on the 2D phase velocity spectrum, we **selected** the period minimum ( $T_{min}$ ) **to be** at least **two times** larger than the sampling interval ( $2 \times dt$ ). In this study we set  $T_{min}$  **to**  $3 \times dt$ . **Because the**  $dt$  of Shigaraki data was 5.5 min, we set the  $T_{min}$  to 16.5 min for all datasets to obtain the same frequency range. This setting can be easily altered by changing the input keyword ( $T_{min}$ ) when running the function. The **defaults were used** for the other wave parameters.

10 Figure 3 shows the day-to-day variation of 2D phase velocity spectrum results **for** (a) Syowa Station, (b) Shigaraki, and (c) Tomohon. The **top and left represent** the north and east **respectively**. The day-to-day plot at Syowa Station shows a lack of eastward **gravity wave** (GW) propagation **and** a dominant westward propagation, which is probably due to the filtering effect by **the** eastward polar night jet, as described in *Matsuda et al.* (2014). However, the azimuth direction with large power spectral density was not always the same; **a much narrower azimuth distribution was observed** on May 13 and 14. This suggests  
15 that the distribution of the GW sources **was** limited on these days and changed from day to day. On the contrary, the 2D phase velocity spectrum for Shigaraki shows a lack of westward propagation and dominant eastward and southward propagations. The **strong spectrum based on** Shigaraki data has a much larger day-to-day azimuth variation than that for Syowa, suggesting that the distribution of the wave source region varied more in Shigaraki, at least in this season’s April and May. The day-to-day variation of the propagation direction was even stronger **in** Tomohon. At the same time, a significant day-to-day variation  
20 of the magnitude of the power spectrum was **observed**. The power was the weakest on April 13; it was much stronger **on** May 5 and is overscaled in the plot. The last panel in Fig. 3c was plotted with the maximum color level; it is  $\sim 30$  times larger than the others. Such a significant day-to-day variation **indicates the** intermittency of the GWs.

Figure 4a shows the average nightly spectrum at each observation site plotted on the world map. The average phase velocity spectrum at **the** Syowa Station shows a distinct westward propagation with a phase speed **below** 50 m/s. In Shigaraki, AGWs **propagate** dominantly in east/southeastward direction and reach phase speeds up to  $\sim 80$  m/s. The AGWs in Tomohon show a **preferred** propagation direction, **that is, they are** moving southeastward with phase speeds of up to  $\sim 100$  m/s. It should be noted that the plot **for** Tomohon is highly affected by a single day, May 5. This **also** indicates the intermittency of GWs, which suggests that the net momentum transportation highly **depends** on **the** very strong GWs with **smaller** occurrence frequency.

30 One can discuss the AGW propagation by comparing the 2D phase velocity spectrum and background conditions along the propagation path. Figures 4b and c show **the** zonal and meridional wind profiles, respectively, **obtained from** Modern-Era Retrospective Analysis for Research and Applications (MERRA-2; *Gelaro et al.*, 2011) **for** each observation site. The profiles were averaged over the clear nights of the observed AGWs. **The** zonal wind over **the** Syowa Station, which was averaged over nine clear-sky nights, shows strong eastward wind up to  $\sim 50$  m/s around  $\sim 50$  km, which could filter out the

waves propagating eastward. A similar conclusion was reported by *Matsuda et al.* [2017] who applied a GWs blocking diagram (*Taylor et al.*, 1993; *Tomikawa*, 2015) by using horizontal wind data from MERRA and the medium frequency (MF) radar to discuss the preferred wave propagation direction observed in the phase velocity spectrum. They concluded that eastward-propagating AGWs are restricted to propagate up to the mesopause due to critical-level filtering.

5 In contrast to the strong zonal wind at the Syowa Station, the average zonal wind profile in Shigaraki over ten clear nights shows relatively weak westward wind with a speed of up to ~30 m/s at ~50 km altitude. Previous studies of the seasonal directionality of AGWs in Shigaraki showed that east–west propagation anisotropy is usually caused by wind filtering of the mesospheric jet (e.g., *Nakamura et al.*, 1999; *Ejiri et al.*, 2003; *Takeo et al.*, 2017). However, the westward wind in our current case for April–May 2011 is not stronger than 30 m/s above the stratosphere; it is not strong enough to filter out all GWs with westward propagation. The average tropopause eastward jet is as strong as 60 m/s. If the GW source is associated with such an eastward jet structure, the horizontal phase velocity distribution of generated GWs should shift eastward. This could also be the reason of the lack of westward-propagating AGWs, especially that with higher phase velocities such as over 40 m/s.

The average zonal wind in Tomohon is small (<20 m/s) and likely has a limited impact on the much faster AGW phase speed (~100 m/s). However, Fig. 4a shows that the GWs over Tomohon have a dominant southeastward propagation. As already discussed, this distribution is affected by the spectrum of a single day and should be highly affected by the location of the strong wave source on that day. *Haffke et al.* [2016] reported that the Intertropical Convergence Zone (ITCZ) is located above the equator between March and April and starts to move north of the equator in May, which could explain the dominant southward propagation of AGWs observed on May 5, 2016 (Fig. 3c). The scenario in which the distribution of the source location has a more significant effect on the AGW propagation direction than the background wind in the equatorial region agrees well with results reported by *Nakamura et al.* [2003]. They reported AGW characteristics for Tanjungsari, Indonesia (107.9°E, 6.9°S) based on the analysis of Geostationary Meteorological Satellite (GMS) data and concluded that the distribution of tropospheric clouds that are located mainly in the opposite direction of the wave propagation plays a more significant role than the relatively weak background wind. The meridional wind at each observation site has a weak velocity (<5 m/s) and likely has almost no impact on the wave propagation direction.

25

#### 4 Conclusion

We developed a user-friendly IDL function based on *Matsuda et al.*'s (2014) 3D FFT method for airglow data analysis. This function efficiently deals with extensive amounts of imaging data obtained in different years and at various observation sites without bias caused by the analysis by different research groups and treats the dynamical/physical effect of AGWs by precisely reflecting the amplitude, area, and lifetime of each AGW event with a reasonable execution time. It can also be applied for airglow data with different observation parameters such as the image sampling interval. This new function was applied to airglow imaging data obtained from April–May of selected years at three different latitudes: Syowa Station (69°S, 40°E), Shigaraki (35°N, 136°E), and Tomohon (1°N, 122°E). By comparing the 2D phase velocity spectra of each site, we found that the day-to-day variation in Shigaraki is larger than that at the Syowa Station. The day-to-day

variation in Tomohon has an even greater variability than the other two sites, which suggests that the distribution of the source region in Shigaraki and Tomohon is likely more variable than at the Syowa Station. We also found that the day-to-day variation in Tomohon includes a significant variation of the phase spectrum magnitude, which indicates the intermittency of AGWs. The average nightly spectrum shows a dominant westward wave with a phase speed <50 m/s at the Syowa Station and an east/southeastward propagation with a phase speed of up to ~80 m/s in Shigaraki. Southeastward propagation was observed in Tomohon; however, this result is highly affected by a single day with an extremely strong power spectrum. The phase speed in Tomohon reaches up to ~100 m/s, which is larger than that at the other two sites. The comparison of the 2D phase velocity spectra with background wind profiles derived from MERRA-2 data revealed that wind filtering plays a more significant role in filtering out eastward-propagating waves at the Syowa Station. On the other hand, the background winds in Shigaraki and Tomohon are not strong enough to filter out AGWs that propagate in the opposite direction of the observed wave propagation. This shows that the dominant propagation directions observed in Shigaraki and at the Tomohon Observatory are likely related to the distribution/characteristics of the source region. We demonstrated the distinct difference of the GW propagation characteristics at three different latitudes based on the phase velocity spectra. These results indicate the usefulness of phase velocity spectra for the characterization and comparison of GW characteristics at different sites and the effectiveness of the new M-transform function for airglow imaging data obtained at these locations. The comparison made in the current study is limited to the period of April–May for which enough preprocessed clear night data were available. In the future, we plan to extend this comparison and include data for all seasons and months with more global coverage.

20 Competing interests. The authors declare that they have no conflict of interest.

### Acknowledgements

The airglow imaging at Syowa was carried out by the Japanese Antarctic Research Expedition (JARE) of the Ministry of Education, Culture, Sports, Science and Technology (MEXT). The airglow imager in Tomohon is operated by the National Institute of Aeronautics and Space (LAPAN), Indonesia. The airglow imager in Shigaraki is operated by Institute for Space-Earth Environmental Research (ISEE), Nagoya University, in collaboration with the Research Institute for Sustainable Humanosphere, Kyoto University. This research was supported by JSPS KAKENHI grants (JP 15H02137, JP 15H05815, and JP 16H06286), projects KP-1 and KP-301 of the National Institute of Polar Research (NIPR), and by the JSPS Core-to-Core Program, B. Asia-Africa Science Platforms. This publication was supported by an NIPR publication subsidy.

30

## References

- Alexander, M. J.: Interpretations of observed climatological patterns in stratospheric gravity wave variance, *J. Geophys. Res.*, 103(D8), 8627–8640, doi: 10.1029/97JD03325, 1998.
- Coble, M., G. C. Papen, and C. S. Gardner: Computing two-dimensional unambiguous horizontal wavenumber spectra from  
5 OH airglow images, *IEEE Trans. Geosci. Remote Sens.*, 36(2), 368–382, doi:10.1109/36.662723, 1998.
- Ejiri, M. K., K. Shiokawa, T. Ogawa, K. Igarashi, T. Nakamura, and T. Tsuda: Statistical study of short-period gravity waves in OH and OI nightglow images at two separated sites, *J. Geophys. Res.*, 108(D21), 4679, doi:10.1029/2002JD002795, 2003.
- Fritts, D. C.: Gravity wave saturation in the middle atmosphere: A review of theory and observations, *Rev. Geophys.*, 22, 275–308, doi:10.1029/RG022i003p00275, 1984.
- 10 Fritts, D. C., and M. J. Alexander: Gravity wave dynamics and effects in the middle atmosphere, *Rev. Geophys.*, 41(1), 1003, doi:10.1029/2001RG000106, 2003.
- Gelaro, R., W. McCarty, M.J. Suarez, R. Todling, A. Molod, L. Takacs, C.A. Randles, A. Darmenov, M.G. Bosilovich, R. Reichle, K. Wargan, L. Coy, R. Cullather, C. Draper, S. Akella, V. Buchard, A. Conaty, A.M. Da Silva,  
15 Gelaro, R., W. McCarty, M.J. Suarez, R. Todling, A. Molod, L. Takacs, C.A. Randles, A. Darmenov, M.G. Bosilovich, R. Reichle, K. Wargan, L. Coy, R. Cullather, C. Draper, S. Akella, V. Buchard, A. Conaty, W. Gu, G.K. Kim, R. Koster, R. Lucchesi, D. Merkova, J.E. Nielsen, G. Partyka, S. Pawson, W. Putman, M. Rienecker, S.D. Schubert, M. Sienkiewicz, B. Zhao: The Modern-Era Retrospective Analysis for Research and Applications, Version-2 (MERRA-2). *J. Climate*, 30, 5419–5454. DOI 10.1175/JCLI-D-16-0758.1, 2017.
- Haffke, C., Magnusdottir, G., Henke, D., Smyth, P., and Peings, Y.: Daily states of the March–April east Pacific ITCZ in three  
20 decades of high-resolution satellite data. *J. Clim.*, 29, 2981–2995, 2016.
- Kubota, M., H. Fukunishi, and S. Okano: Characteristics of medium and large-scale TIDs over Japan derived from OI 630-nm nightglow observation, *Earth Planets Space*, 53, 741–751, 2001.
- Lindzen, R.: Turbulence and stress owing to gravity wave and tidal breakdown, *J. Geophys. Res.*, 86(C10), 9707–9714, doi:10.1029/JC086iC10p09707, 1981.
- 25 Matsuda, T. S., T. Nakamura T., M. K. Ejiri, M. Tsutsumi, and K. Shiokawa: New statistical analysis of the horizontal phase velocity distribution of gravity waves observed by airglow imaging, *J. Geophys. Res. Atmos.*, 119, 9707–9718, doi:10.1002/2014JD021543, 2014.
- Matsuda, T. S., T. Nakamura, M. K. Ejiri, M. Tsutsumi, Y. Tomikawa, M. J. Taylor, Y. Zhao, P.D. Pautet, D. J. Murphy, and T. Moffat-Griffin: Characteristics of mesospheric gravity waves over Antarctica observed by Antarctic Gravity Wave  
30 Instrument Network imagers using 3-D spectral analyses, *J. Geophys. Res. Atmos.*, 122, 8969–8981, doi:10.1002/2016JD026217, 2017.
- Matsuno, T.: A quasi-one-dimensional model of the middle atmospheric circulation interacting with internal gravity waves, *J. Meteorol. Soc. Jpn.*, 60, 215–226, 1982.



- Nakamura, T., A. Higashikawa, T. Tsuda, and Y. Matsushita: Seasonal variations of gravity wave structures in OH airglow with a CCD imager at Shigaraki, *Earth Planets and Space*, 51, 897–906, 1999.
- Nakamura, T., T. Aono, and T. Tsuda: Mesospheric gravity waves over a tropical convective region observed by OH airglow imaging in Indonesia. *Geophysical Research Letters*, 30(17), 1882, doi:10.1029/2003GL017619, 2003.
- 5 R. A. Dwyer: A faster divide-and-conquer algorithm for constructing Delaunay triangulations. *Algorithmica*, 2:137–151, 1987.
- Shiokawa, K., Y. Otsuka, and T. Ogawa: Propagation characteristics of nighttime mesospheric and thermospheric waves observed by optical mesosphere thermosphere imagers at middle and low latitudes, *Earth Planets Sci.*, 61, 479–491, 2009.
- Su P., and R. L. Scot Drysdale: A comparison of sequential Delaunay triangulation algorithms. *Comp Geom-Theor Appl*, 7(5–6), 361–385, 1997.
- 10 Suzuki, S., K. Shiokawa, Y. Otsuka, T. Ogawa, K. Nakamura, and T. Nakamura: A concentric gravity wave structure in the mesospheric airglow images, *J. Geophys. Res.*, 112, D02102, doi: 10.1029/ 2005JD006558, 2007.
- Takeo, D., K. Shiokawa, H. Fujinami, Y. Otsuka, T. S. Matsuda, M. K. Ejiri, T. Nakamura, and M. Yamamoto: Sixteen-year variation of horizontal phase velocity and propagation direction of mesospheric and thermospheric waves in airglow images at Shigaraki, Japan, *J. Geophys. Res. Space Physics*, 122, doi:10.1002/2017JA023919, 2017.
- 15 Tsuchiya, S., K. Shiokawa, H. Fujinami, Y. Otsuka, T. Nakamura, and M. Yamamoto: Statistical analysis of the phase velocity distribution of mesospheric and ionospheric waves observed in airglow images over a 16-year period: comparison between Rikubetsu and Shigaraki, Japan, *J. Geophys. Res.*, 123, doi:10.0002/2018JA025585, 2018.
- Wright, C. J., Hindley, N. P., Moss, A. C., and N. J. Mitchell: Multi-instrument gravity-wave measurements over Tierra del Fuego and the Drake Passage – Part I: Potential energies and vertical wavelenghts from AIRS, COSMIC, HIRDLS, MLS-
- 20 Aura, SAAMER, SABER and radiosondes, *Atmos. Meas. Tech.*, 9, 877–908, <https://doi.org/10.5194/amt-9-877-2016>, 2016.
- Y. Tomikawa: Gravity wave transmission diagram, *Ann. Geophys.*, 33, 1479–1484, 2015, doi:10.5194/angeo-33-1479, 2015.

25

30

Table 1. Description of M-transform function on IDL.

| Program Description |                                                                                                                                                                                                                                                                                                                                                                                                                                                                                                                                                                                                                                                                                     |
|---------------------|-------------------------------------------------------------------------------------------------------------------------------------------------------------------------------------------------------------------------------------------------------------------------------------------------------------------------------------------------------------------------------------------------------------------------------------------------------------------------------------------------------------------------------------------------------------------------------------------------------------------------------------------------------------------------------------|
| Name                | Matsuda_transform                                                                                                                                                                                                                                                                                                                                                                                                                                                                                                                                                                                                                                                                   |
| Purpose             | Calculate horizontal phase velocity spectra from airglow intensity image data using 3D FFT                                                                                                                                                                                                                                                                                                                                                                                                                                                                                                                                                                                          |
| Calling Sequence    | Result=Matsuda_transform(Img)                                                                                                                                                                                                                                                                                                                                                                                                                                                                                                                                                                                                                                                       |
| Inputs              | Img: Time series of 2D airglow data in geographic coordinates ( $x, y, t$ )                                                                                                                                                                                                                                                                                                                                                                                                                                                                                                                                                                                                         |
| Input Keywords      | <p>a. dx, dy, dt: Image resolution in <math>x</math> (m), <math>y</math> (m), and time (s)</p> <p>b. LH_min, LH_max: Minimum and maximum horizontal wavelength (m) to be processed</p> <p>c. T_min, T_max: Minimum and maximum wave period (s) to be processed</p> <p>d. Vp_min, Vp_max: Minimum and maximum horizontal phase speed (m/s) to be calculated</p> <p>e. zpx, zpy, zpt: Dimension of the zero-padded image size in <math>x, y,</math> and <math>t</math> to improve the intervals of <math>k, l,</math> and <math>\omega</math></p> <p>f. min1, max1: Minimum and maximum phase velocity spectra to be plotted</p> <p>g. Interpolation: Select interpolation method</p> |
| Outputs             | 2D phase velocity spectra ( $v_x, v_y$ )                                                                                                                                                                                                                                                                                                                                                                                                                                                                                                                                                                                                                                            |
| Remarks             | Requires equal sampling interval time resolution ( $dt$ )                                                                                                                                                                                                                                                                                                                                                                                                                                                                                                                                                                                                                           |

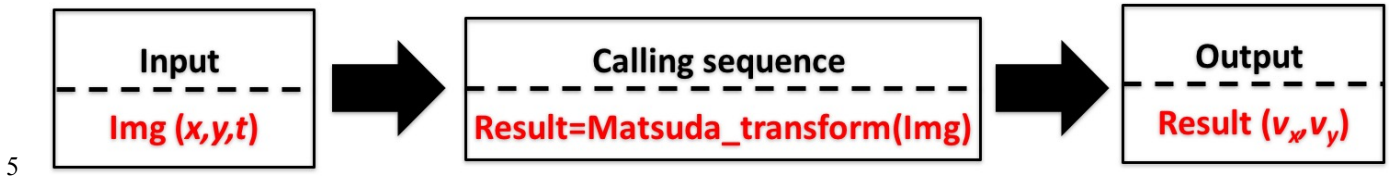

5 Figure 1: Flow chart showing the input, how to run the program, and the output format.

10

15

20

25

30

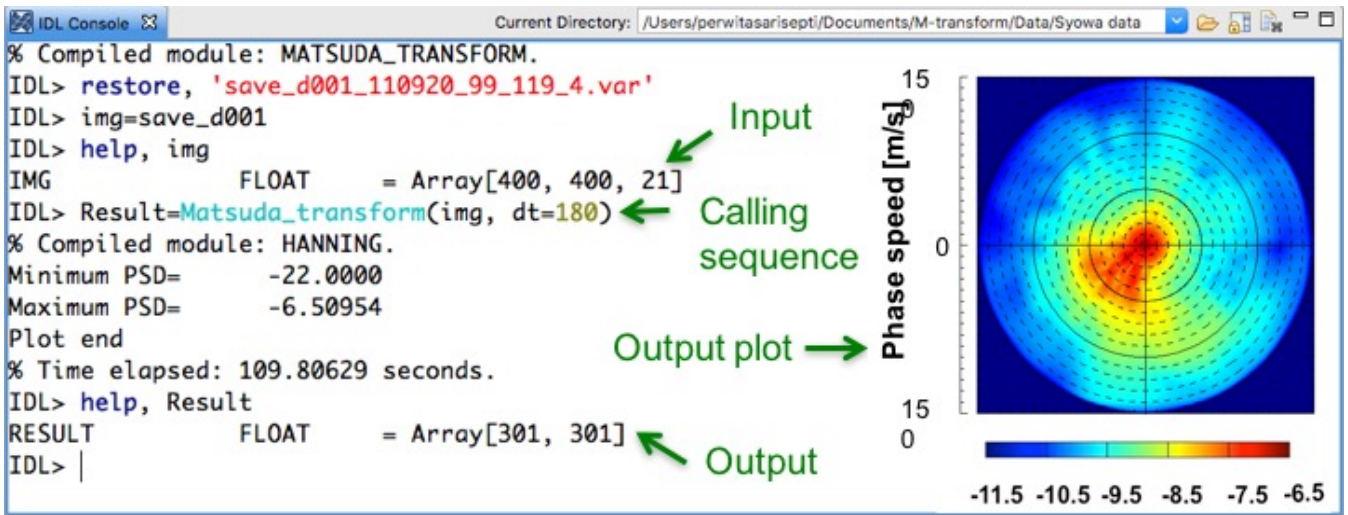

Figure 2: Example of how to use the Matsuda-transform (M-transform) program showing the input, calling sequence, total calculation time, and output as 2D phase velocity spectrum.

5

10

15

20

**Table 2. Summary of airglow imagers used in this study**

| Station name<br>(Country)                               | Syowa<br>(Antarctic)                              | Shigaraki<br>(Japan) | Tomohon<br>(Indonesia)                                    |
|---------------------------------------------------------|---------------------------------------------------|----------------------|-----------------------------------------------------------|
| Location                                                | 40°E, 69°S                                        | 136°E, 35°N          | 122°E, 1°N                                                |
| Institution                                             | National Institute of<br>Polar Research<br>(NIPR) | Nagoya University    | National Institute of<br>Aeronautics and Space<br>(LAPAN) |
| Airglow emission                                        | Na (589.6 nm)                                     | OI (557.7 nm)        | OI (557.7 nm)                                             |
| Sampling interval ( <i>dt</i> ) (min)                   | 1                                                 | 5.5                  | 2.5                                                       |
| Image Size (km)                                         | 400 × 400                                         | 400 × 400            | 400 × 400                                                 |
| Minimum wave period<br>( <i>T<sub>min</sub></i> ) (min) | 16.5                                              | 16.5                 | 16.5                                                      |
| Maximum wave period<br>( <i>T<sub>max</sub></i> ) (min) | 60                                                | 60                   | 60                                                        |

5

10

15

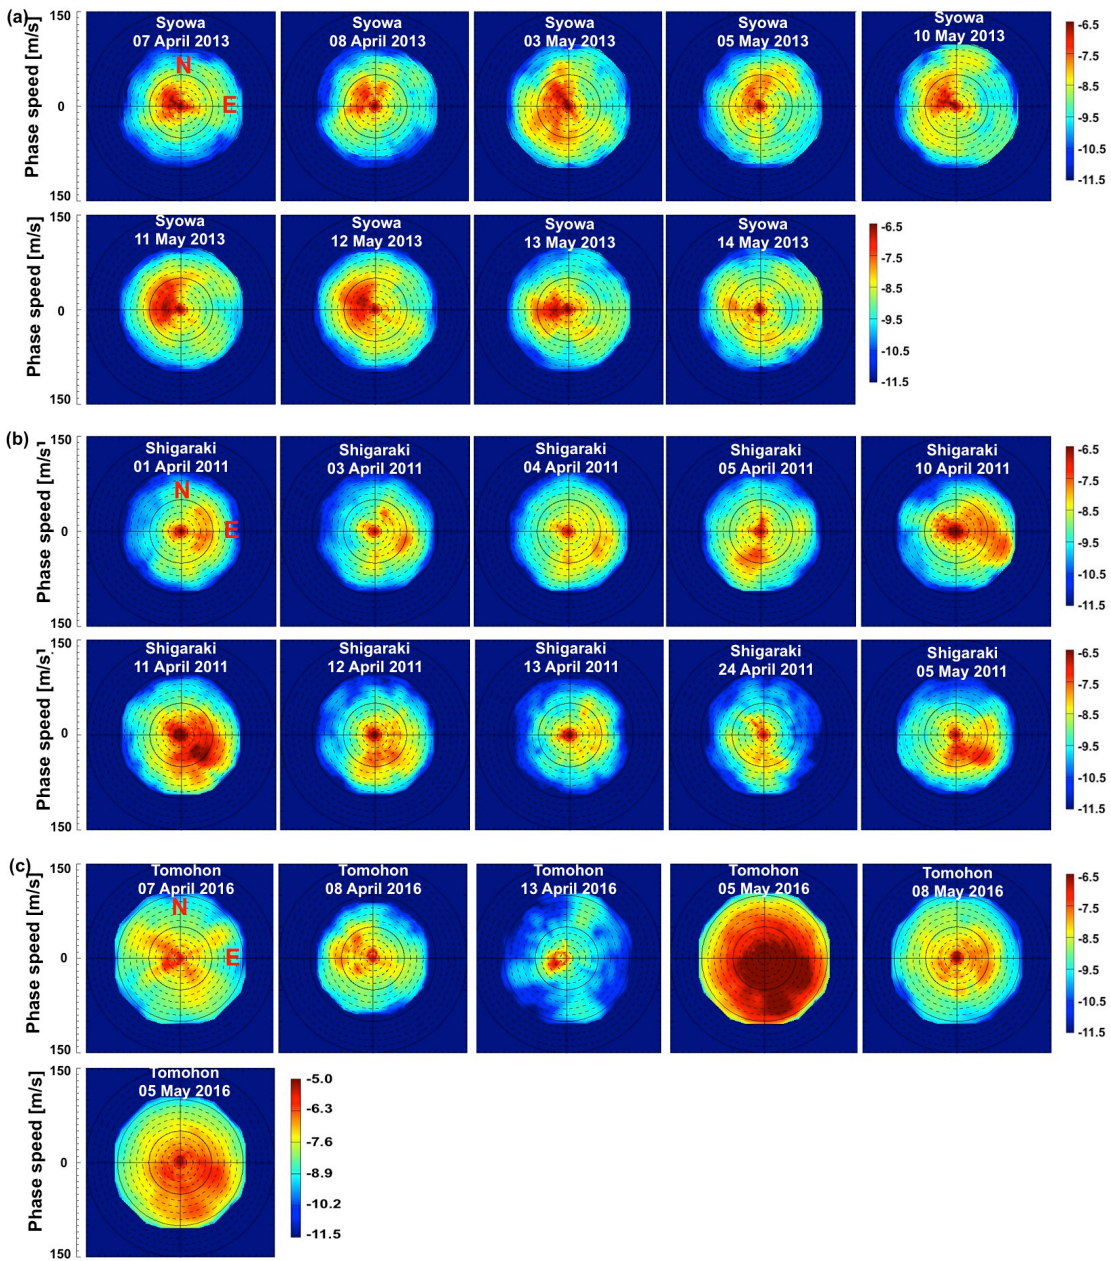

Figure 3: Day-to-day variation of 2D phase velocity spectra for April–May 2013 at the Syowa Station (a), in Shigaraki (2011) (b),  
 5 and in Tomohon (2016) (c). Figure 3c is the same as that for May 5, 2016, but with a different color bar level to better visualize the  
 dominant wave propagation direction.

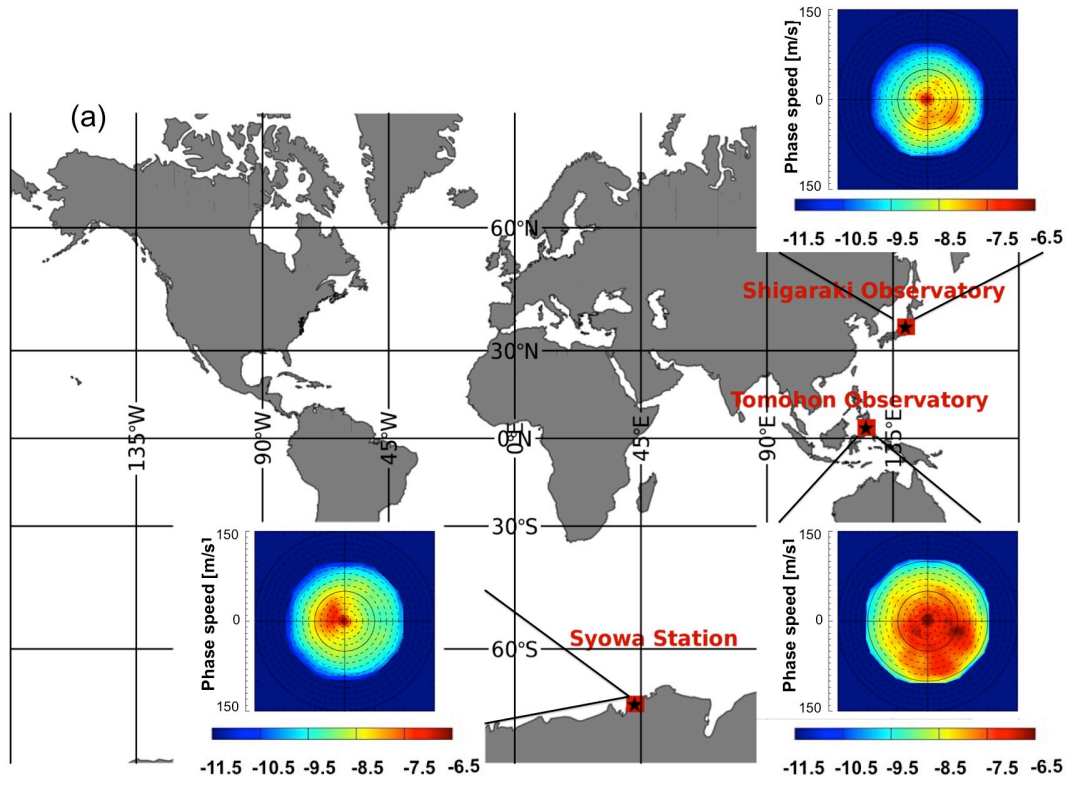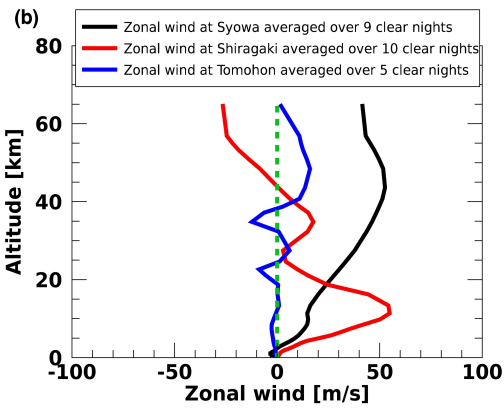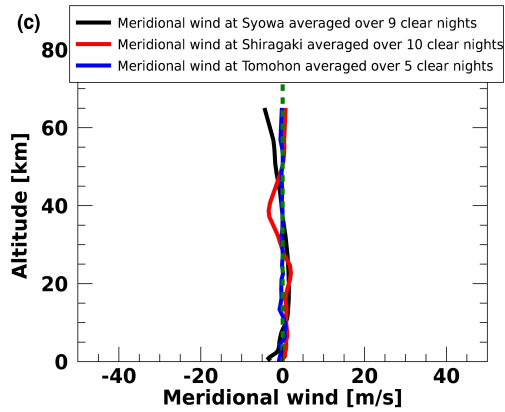

Figure 4: (a) Average day-to-day variation of the 2D phase velocity spectrum of AGWs observed at Syowa, in Shiragaki, and in Tomohon. (b) Average zonal wind profiles (positive: eastward) and (c) average meridional wind profiles (positive: northward) of GWs observed during clear nights from MERRA-2 data.
